# Supplementary material
Source: Springer Nature journal article supplement (https://www.springermedizin.de/resource/supplementary/12943_2012_1042_MOESM7_ESM.pdf/9552168)

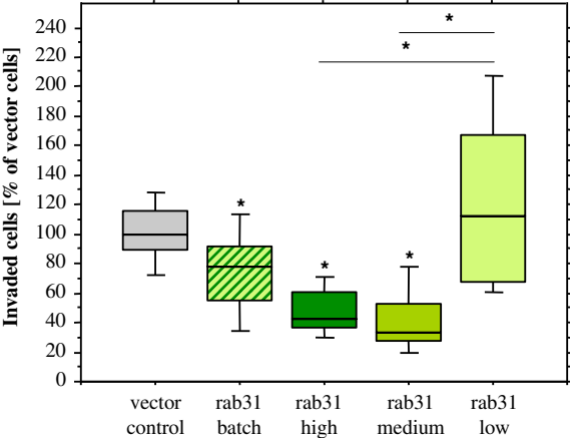

Supplement: MOESM7 [file 9552168]
